# Supplementary material
Source: publisher site journal article supplement (https://www.dovepress.com/article/474229)
Supplement: Supplementary file 1 [file get_supplementary_file.php]

Supplementary Table 1-1. The comparison of CT findings between the immunocompetent and immunocompromised groups of each infection

| **CT signs（n（%））** | Bacteria | | | Virus | | | Fungi | | | Tuberculosis | | | Pneumocystis jirovecii | | |
| --- | --- | --- | --- | --- | --- | --- | --- | --- | --- | --- | --- | --- | --- | --- | --- |
| Immunocompetent group（n=54） | Immunocompromised group（n=28） | p | Immunocompetent group（n=2） | Immunocompromised group（n=6） | p | Immunocompetent group（n=11） | Immunocompromised group（n=11） | p | Immunocompetent group（n=13） | Immunocompromised group（n=3） | p | Immunocompetent group（n=1） | Immunocompromised group（n=8） | p |
| Consolidation | 41（75.9） | 16（57.1） | 0.08 | 2（100.0） | 2（33.3） | 0.414 | 8（72.7） | 7（63.6） | 1 | 9（69.2） | 2（66.7） | 1 | 1（100.0） | 3（37.5） | 0.906 |
| GGA | 17（31.5） | 11（39.3） | 0.48 | 1（50.0） | 5（83.3） | 1 | 2（18.2） | 4（36.4） | 0.632 | 4（30.8） | 0 | 0.529 | 0 | 0 | - |
| Crazy-paving pattern | 4（7.4） | 1（3.6） | 0.84 | 1（50.0） | 0 | 0.25 | 0 | 0 | - | 0 | 0 | - | 0 | 3（37.5） | 1 |
| Mosaic pattern | 1（1.9） | 0 | 1 | 0 | 0 | - | 0 | 0 | - | 0 | 0 | - | 0 | 1（12.5） | 1 |
| Nodules | 24（44.4） | 9（32.1） | 0.281 | 1（50.0） | 2（33.3） | 1 | 7（63.6） | 7（63.6） | 1 | 7（53.8） | 1（33.3） | 1 | 0） | 2（25.0） | 1 |
| CT-halo sign | 1（1.9） | 2（7.1） | 0.555 | 0 | 1（16.7） | 1 | 1（9.1） | 5（45.5） | 0.151 | 0 | 1（33.3） | 0.188 | 0 | 0 | - |
| Tree-in-bud pattern | 4（7.4） | 2（7.1） | 1 | 0 | 1（16.7） | 1 | 0 | 0 | - | 5（38.5） | 0 | 0.509 | 0 | 1（12.5） | 1 |
| Bronchial wall thickening | 8（14.8） | 1（3.6） | 0.241 | 0 | 1（16.7） | 1 | 0 | 0 | - | 0 | 0 | - | 0 | 0 | - |
| ILS thickening | 7（13.0） | 6（21.4） | 0.499 | 0 | 0 | - | 2（18.2） | 2（18.2） | 1 | 1（7.7） | 0 | 1 | 0 | **6（75.0）** | 0.333 |
| hilar or mediastinal LN enlargement | 4（7.4） | 1（3.6） | 0.84 | 0 | 0 | - | 1（9.1） | 0 | 1 | 2（15.4） | 0 | 1 | 0 | 0 | - |
|  |  |  |  |  |  |  |  |  |  |  |  |  |  |  |  |

Supplementary Table 1-2. The comparison of CT findings between the HM and non-HM groups of each infection

| **CT signs（n（%））** | Bacteria | | | Virus | | | Fungi | | | Tuberculosis | | | Pneumocystis jirovecii | | |
| --- | --- | --- | --- | --- | --- | --- | --- | --- | --- | --- | --- | --- | --- | --- | --- |
| HM group（n=12） | Non-HM group（n=16） | p | HM group（n=6） | Non-HM group（n=0） | p | HM group（n=7） | Non-HM group（n=4） | p | HM group（n=3） | Non-HM group（n=0） | p | HM group（n=7） | Non-HM group（n=1） | p |
| Consolidation | 6(50.0) | 10(62.5) | 0.51 | 2(33.3) | 0 | - | 5(71.4) | 2(50.0) | 0.95 | 2(66.7) | 0 | - | 2(28.6) | 1(100.0) | 0.78 |
| GGA | 4(33.3) | 7(43.8) | 0.87 | 5(83.3) | 0 | - | 4(57.1) | 0 | 0.19 | 0 | 0 | - | 0 | 0 | - |
| Crazy-paving pattern | 0 | 1(6.3) | 1.00 | 0 | 0 | - | 0 | 0 | - | 0 | 0 | - | 2(28.6) | 1(100.0) | 0.78 |
| Mosaic pattern | 0 | 0 | - | 0 | 0 | - | 0 | 0 | - | 0 | 0 | - | 1(14.3) | 0 | 1.00 |
| Nodules | 2(16.7) | 7(43.8) | 0.27 | 2(33.3) | 0 | - | 5(71.4) | 2(50.0) | 0.58 | 1(33.3) | 0 | - | 2(28.6) | 0 | 1.00 |
| CT-halo sign | 0 | 2(12.5) | 0.49 | 1(16.7) | 0 | - | 2(28.6) | 3(75.0) | 0.24 | 1(33.3) | 0 | - | 0 | 0 | - |
| Tree-in-bud pattern | 1(8.3) | 1(6.3) | 1.00 | 1(16.7) | 0 | - | 0 | 0 | - | 0 | 0 | - | 1(14.3) | 0 | 1.00 |
| Bronchial wall thickening | 1(8.3) | 0 | 0.43 | 1(16.7) | 0 | - | 0 | 0 | - | 0 | 0 | - | 0 | 0 | - |
| ILS thickening | 2(16.7) | 4(25.0) | 0.95 | 0 | 0 | - | 2(28.6) | 0 | 0.49 | 0 | 0 | - | 5(71.4) | 1(100.0) | 1.00 |
| hilar or mediastinal LN enlargement | 0 | 1(6.3) | 1.00 | 0 | 0 | - | 0 | 0 | - | 0 | 0 | - | 0 | 0 | - |

Supplementary Table 2. The comparison of CT findings between the HM and non-HM groups

|  | HM group（n=63） | Non-HM group（n=42） | p-value |
| --- | --- | --- | --- |
| **CT signs（n（%））** |  |  |  |
| Consolidation | 33（52.4） | 29（69.0） | 0.089 |
| GGA | 36（57.1） | 16（38.1） | 0.056 |
| Crazy-paving pattern | 4（6.3） | 5（11.9） | 0.522 |
| Mosaic pattern | 1（1.6） | 0 | 1.000 |
| Nodules | 21（33.3） | 15（35.7） | 0.801 |
| CT-halo sign | 13（20.6） | 9（21.4） | 0.922 |
| Tree-in-bud pattern | 5（7.9） | 2（4.8） | 0.700 |
| Bronchial wall thickening | 5（7.9） | 0 | 0.157 |
| ILS thickening | 17（27.0） | 9（21.4） | 0.518 |
| hilar or mediastinal LN enlargement | 2（3.2） | 3（7.1） | 0.640 |
| **The extent of the lesions *（n（%））** |  |  |  |
| 0 | 0 | 0 |  |
| 1 | 24（38.1） | 24（57.1） | 0.055 |
| 2 | 12（19.0） | 11（26.2） | 0.386 |
| 3 | 13（20.6） | 4（9.5） | 0.130 |
| 4 | 11（17.5） | 3（7.1） | 0.128 |
| 2-4 | 36（57.1） | 18（42.8） | 0.078 |
| missing | 3（4.8） | 0 | 0.057 |

* the extent of the lesions within the entire lung field was graded subjectively on a five-point scale (0 =0%, 1 = 1–25%, 2 = 26–50%, 3 = 51–75%, and 4 = 76–100%).
